# Supplementary material for: Hybrid Coatings for Active Protection against Corrosion of Mg and Its Alloys
Source: MDPI journal article supplement (doi:10.3390/polym15143035), 2023-07-13
Supplement: s1 [file s1]

# Hybrid Coatings for Active Protection against Corrosion of Mg and Its Alloys

Andrey S. Gnedenkov \*, Sergey L. Sinebryukhov, Valeriia S. Filonina, Alexander Yu. Ustinov and Sergey V. Gnedenkov

Institute of Chemistry FEB RAS, Vladivostok, 690022, Russia; sls@ich.dvo.ru (S.L.S.);  
filonina.vs@gmail.com (V.S.F.); all\_vl@mail.ru (A.Y.U.); svg21@hotmail.com (S.V.G.)

\* Correspondence: asg17@mail.com; Tel.: +8-(423)-2215284; Fax: +8-(423)-2312590

1  
2  
3  
4  
5  
6  
7  
8  
9  
10

## SUPPLEMENTARY MATERIALS

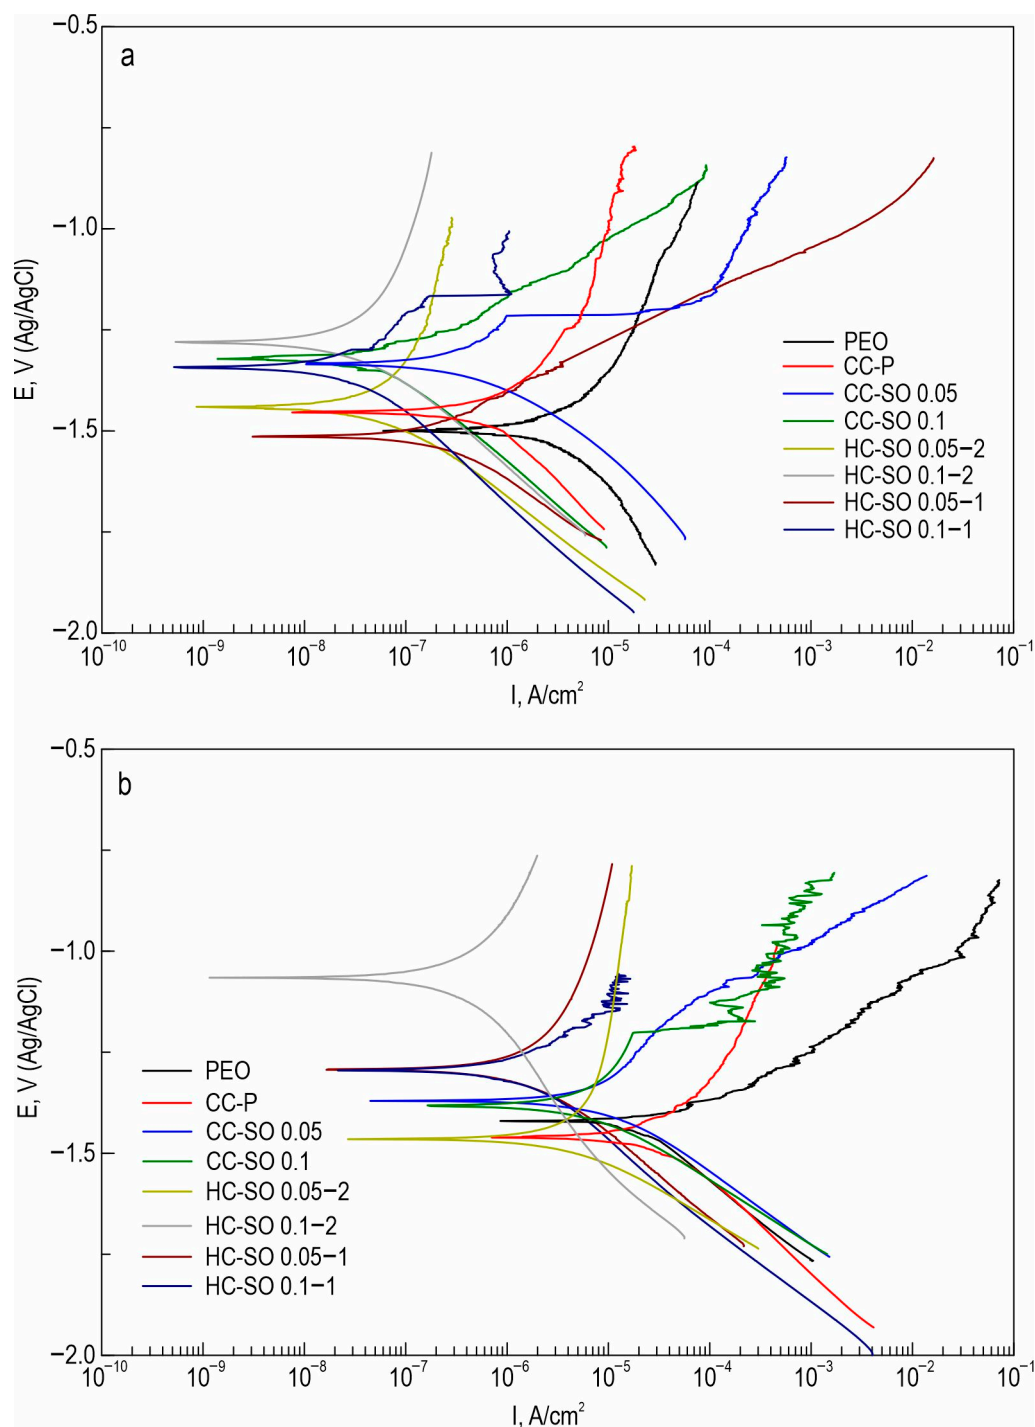

**Figure S1.** Polarization curves obtained after 1h (a) and 24 h (b) of exposure of the studied samples to 0.9%NaCl solution

**Table S1.** The calculated parameters of the EEC elements, obtained by fitting the experimental impedance spectra of the coated samples during their exposure to a 0.9% NaCl solution

| Exposure<br>time, h | $CPE_1$                                                    |       | $R_1, \Omega \cdot \text{cm}^2$ | $CPE_2$                                                    |       | $R_2, \Omega \cdot \text{cm}^2$ |
|---------------------|------------------------------------------------------------|-------|---------------------------------|------------------------------------------------------------|-------|---------------------------------|
|                     | $Q_1,$<br>$\text{S} \cdot \text{cm}^{-2} \cdot \text{s}^n$ | $n_1$ |                                 | $Q_2,$<br>$\text{S} \cdot \text{cm}^{-2} \cdot \text{s}^n$ | $n_2$ |                                 |
| PEO                 |                                                            |       |                                 |                                                            |       |                                 |
| 1                   | $8.41 \times 10^{-7}$                                      | 0.61  | 2897                            | $6.46 \times 10^{-7}$                                      | 0.91  | 77,559                          |
| 3                   | $6.75 \times 10^{-7}$                                      | 0.62  | 2362                            | $1.31 \times 10^{-6}$                                      | 0.81  | 73,670                          |
| 5                   | $7.78 \times 10^{-7}$                                      | 0.61  | 2243                            | $1.31 \times 10^{-6}$                                      | 0.82  | 86,070                          |
| 7                   | $4.14 \times 10^{-7}$                                      | 0.65  | 1554                            | $1.53 \times 10^{-6}$                                      | 0.80  | 67,398                          |
| 9                   | $4.20 \times 10^{-7}$                                      | 0.65  | 1589                            | $1.23 \times 10^{-6}$                                      | 0.84  | 82,627                          |
| 11                  | $5.78 \times 10^{-7}$                                      | 0.63  | 1670                            | $1.21 \times 10^{-6}$                                      | 0.83  | 65,201                          |
| 13                  | $4.55 \times 10^{-7}$                                      | 0.64  | 1481                            | $2.17 \times 10^{-6}$                                      | 0.73  | 49,428                          |
| 15                  | $7.32 \times 10^{-7}$                                      | 0.61  | 1628                            | $1.12 \times 10^{-6}$                                      | 0.86  | 63,934                          |
| 17                  | $4.70 \times 10^{-7}$                                      | 0.64  | 1266                            | $1.77 \times 10^{-6}$                                      | 0.78  | 50,641                          |
| 19                  | $9.11 \times 10^{-7}$                                      | 0.58  | 1554                            | $1.09 \times 10^{-6}$                                      | 0.85  | 69,427                          |
| 21                  | $9.33 \times 10^{-7}$                                      | 0.57  | 1701                            | $1.36 \times 10^{-6}$                                      | 0.86  | 78,171                          |
| 23                  | $4.53 \times 10^{-7}$                                      | 0.54  | 1869                            | $2.23 \times 10^{-6}$                                      | 0.95  | 60,522                          |
| CC-P                |                                                            |       |                                 |                                                            |       |                                 |
| 1                   | $4.41 \times 10^{-9}$                                      | 0.84  | 5229                            | $7.68 \times 10^{-7}$                                      | 0.78  | 112,710                         |
| 3                   | $4.31 \times 10^{-9}$                                      | 0.84  | 7507                            | $8.78 \times 10^{-7}$                                      | 0.77  | 91,727                          |
| 5                   | $4.47 \times 10^{-9}$                                      | 0.84  | 7558                            | $9.33 \times 10^{-7}$                                      | 0.78  | 73,998                          |
| 7                   | $5.09 \times 10^{-9}$                                      | 0.83  | 7652                            | $1.00 \times 10^{-6}$                                      | 0.74  | 109,420                         |
| 9                   | $4.87 \times 10^{-9}$                                      | 0.83  | 8574                            | $1.10 \times 10^{-6}$                                      | 0.71  | 122,800                         |
| 11                  | $5.25 \times 10^{-9}$                                      | 0.82  | 9178                            | $9.34 \times 10^{-7}$                                      | 0.75  | 112,040                         |
| 13                  | $4.84 \times 10^{-9}$                                      | 0.83  | 9449                            | $1.18 \times 10^{-6}$                                      | 0.69  | 120,070                         |
| 15                  | $5.68 \times 10^{-9}$                                      | 0.81  | 9791                            | $1.00 \times 10^{-6}$                                      | 0.74  | 108,650                         |
| 17                  | $5.45 \times 10^{-9}$                                      | 0.82  | 9961                            | $1.38 \times 10^{-6}$                                      | 0.67  | 115,060                         |
| 19                  | $6.14 \times 10^{-9}$                                      | 0.81  | 10,241                          | $1.37 \times 10^{-6}$                                      | 0.65  | 138,260                         |
| 21                  | $5.51 \times 10^{-9}$                                      | 0.81  | 10,846                          | $1.22 \times 10^{-6}$                                      | 0.68  | 133,120                         |
| 23                  | $6.37 \times 10^{-9}$                                      | 0.80  | 11,011                          | $1.39 \times 10^{-6}$                                      | 0.63  | 160,000                         |
| CC-SO 0.05          |                                                            |       |                                 |                                                            |       |                                 |
| 1                   | $4.09 \times 10^{-8}$                                      | 0.85  | 104                             | $7.53 \times 10^{-7}$                                      | 0.81  | 239,180                         |
| 3                   | $3.00 \times 10^{-8}$                                      | 0.87  | 95                              | $1.15 \times 10^{-6}$                                      | 0.88  | 52,501                          |
| 5                   | $9.05 \times 10^{-8}$                                      | 0.78  | 122                             | $1.51 \times 10^{-6}$                                      | 0.89  | 56,584                          |
| 7                   | $2.65 \times 10^{-8}$                                      | 0.88  | 124                             | $1.72 \times 10^{-6}$                                      | 0.88  | 76,668                          |
| 9                   | $1.21 \times 10^{-8}$                                      | 0.95  | 128                             | $1.68 \times 10^{-6}$                                      | 0.88  | 106,680                         |
| 11                  | $8.81 \times 10^{-8}$                                      | 0.80  | 161                             | $1.56 \times 10^{-6}$                                      | 0.89  | 129,100                         |
| 13                  | $7.25 \times 10^{-8}$                                      | 0.82  | 164                             | $1.54 \times 10^{-6}$                                      | 0.89  | 140,970                         |

19

20

|                     |                       |      |        |                       |      |          |
|---------------------|-----------------------|------|--------|-----------------------|------|----------|
| 15                  | $7.94 \times 10^{-8}$ | 0.81 | 171    | $1.54 \times 10^{-6}$ | 0.88 | 151,520  |
| 17                  | $8.71 \times 10^{-8}$ | 0.80 | 180    | $1.52 \times 10^{-6}$ | 0.88 | 143,040  |
| 19                  | $9.24 \times 10^{-8}$ | 0.80 | 180    | $1.57 \times 10^{-6}$ | 0.88 | 128,860  |
| 21                  | $8.87 \times 10^{-8}$ | 0.82 | 175    | $1.56 \times 10^{-6}$ | 0.87 | 131,800  |
| 23                  | $1.68 \times 10^{-8}$ | 0.92 | 154    | $1.68 \times 10^{-6}$ | 0.87 | 127,100  |
| <b>CC-SO 0.1</b>    |                       |      |        |                       |      |          |
| 1                   | $3.41 \times 10^{-7}$ | 0.81 | 19223  | $2.53 \times 10^{-7}$ | 0.81 | 405,580  |
| 3                   | $2.89 \times 10^{-7}$ | 0.95 | 7095   | $6.35 \times 10^{-7}$ | 0.76 | 143,710  |
| 5                   | $8.84 \times 10^{-7}$ | 0.90 | 5766   | $1.62 \times 10^{-6}$ | 0.42 | 109,320  |
| 7                   | $1.20 \times 10^{-6}$ | 0.90 | 6243   | $2.99 \times 10^{-6}$ | 0.25 | 98,219   |
| 9                   | $1.23 \times 10^{-6}$ | 0.89 | 7889   | $1.33 \times 10^{-6}$ | 0.37 | 117,940  |
| 11                  | $1.35 \times 10^{-6}$ | 0.89 | 8326   | $1.43 \times 10^{-6}$ | 0.35 | 137,430  |
| 13                  | $1.32 \times 10^{-6}$ | 0.90 | 9554   | $1.66 \times 10^{-6}$ | 0.32 | 175,010  |
| 15                  | $1.30 \times 10^{-6}$ | 0.90 | 11,669 | $1.66 \times 10^{-6}$ | 0.31 | 177,060  |
| 17                  | $1.32 \times 10^{-6}$ | 0.89 | 11,833 | $2.08 \times 10^{-6}$ | 0.22 | 188,890  |
| 19                  | $1.37 \times 10^{-6}$ | 0.89 | 7890   | $2.03 \times 10^{-6}$ | 0.22 | 188,050  |
| 21                  | $1.36 \times 10^{-6}$ | 0.87 | 6769   | $1.72 \times 10^{-6}$ | 0.31 | 59,374   |
| 23                  | $1.37 \times 10^{-6}$ | 0.89 | 11,514 | $5.05 \times 10^{-6}$ | 0.37 | 93,942   |
| <b>HC-SO 0.05-2</b> |                       |      |        |                       |      |          |
| 1                   | $2.20 \times 10^{-9}$ | 0.92 | 1436   | $4.21 \times 10^{-7}$ | 0.62 | 1011,000 |
| 3                   | $3.07 \times 10^{-9}$ | 0.92 | 1443   | $5.38 \times 10^{-7}$ | 0.64 | 911,680  |
| 5                   | $4.48 \times 10^{-9}$ | 0.90 | 1528   | $4.26 \times 10^{-7}$ | 0.71 | 774,530  |
| 7                   | $4.52 \times 10^{-9}$ | 0.90 | 1345   | $5.17 \times 10^{-7}$ | 0.72 | 734,190  |
| 9                   | $4.31 \times 10^{-9}$ | 0.90 | 1406   | $5.83 \times 10^{-7}$ | 0.72 | 701,280  |
| 11                  | $4.23 \times 10^{-9}$ | 0.90 | 1442   | $6.04 \times 10^{-7}$ | 0.73 | 699,990  |
| 13                  | $4.12 \times 10^{-9}$ | 0.91 | 1460   | $6.18 \times 10^{-7}$ | 0.73 | 651,290  |
| 15                  | $4.00 \times 10^{-9}$ | 0.91 | 1480   | $6.30 \times 10^{-7}$ | 0.74 | 628,750  |
| 17                  | $3.90 \times 10^{-9}$ | 0.91 | 1496   | $6.41 \times 10^{-7}$ | 0.74 | 608,110  |
| 19                  | $1.25 \times 10^{-9}$ | 0.98 | 1435   | $6.27 \times 10^{-7}$ | 0.75 | 579,030  |
| 21                  | $1.22 \times 10^{-9}$ | 0.99 | 1434   | $6.53 \times 10^{-7}$ | 0.75 | 566,180  |
| 23                  | $1.19 \times 10^{-9}$ | 0.99 | 1476   | $6.69 \times 10^{-7}$ | 0.75 | 565,200  |
| <b>HC-SO 0.1-2</b>  |                       |      |        |                       |      |          |
| 1                   | $2.71 \times 10^{-9}$ | 0.85 | 19,098 | $5.44 \times 10^{-7}$ | 0.65 | 247,030  |
| 3                   | $2.88 \times 10^{-9}$ | 0.84 | 22,179 | $5.21 \times 10^{-7}$ | 0.65 | 402,780  |
| 5                   | $3.36 \times 10^{-9}$ | 0.83 | 26,352 | $4.92 \times 10^{-7}$ | 0.66 | 500,280  |
| 7                   | $2.27 \times 10^{-9}$ | 0.86 | 26,566 | $5.58 \times 10^{-7}$ | 0.62 | 646,960  |
| 9                   | $2.16 \times 10^{-9}$ | 0.86 | 28,828 | $5.52 \times 10^{-7}$ | 0.62 | 848,100  |
| 11                  | $2.40 \times 10^{-9}$ | 0.86 | 31,446 | $5.08 \times 10^{-7}$ | 0.65 | 1210,600 |
| 13                  | $2.29 \times 10^{-9}$ | 0.86 | 32,837 | $5.49 \times 10^{-7}$ | 0.63 | 1676,700 |

| 15                  | $1.62 \times 10^{-9}$                                       | 0.89  | 33,876                                | $5.91 \times 10^{-7}$                                       | 0.60  | 1817,200                              |                                                             |       |                                       |
|---------------------|-------------------------------------------------------------|-------|---------------------------------------|-------------------------------------------------------------|-------|---------------------------------------|-------------------------------------------------------------|-------|---------------------------------------|
| 17                  | $1.56 \times 10^{-9}$                                       | 0.89  | 32,006                                | $6.14 \times 10^{-7}$                                       | 0.59  | 1776,700                              |                                                             |       |                                       |
| 19                  | $3.15 \times 10^{-9}$                                       | 0.83  | 30,713                                | $6.31 \times 10^{-7}$                                       | 0.59  | 1315,500                              |                                                             |       |                                       |
| 21                  | $5.93 \times 10^{-9}$                                       | 0.79  | 32,975                                | $6.08 \times 10^{-7}$                                       | 0.61  | 860,470                               |                                                             |       |                                       |
| 23                  | $2.45 \times 10^{-9}$                                       | 0.85  | 29,210                                | $5.93 \times 10^{-7}$                                       | 0.62  | 761,240                               |                                                             |       |                                       |
| HC-SO 0.05–1        |                                                             |       |                                       |                                                             |       |                                       |                                                             |       |                                       |
| 1                   | $1.56 \times 10^{-9}$                                       | 0.99  | 614                                   | $2.00 \times 10^{-6}$                                       | 0.57  | 56,211                                |                                                             |       |                                       |
| 3                   | $1.50 \times 10^{-9}$                                       | 0.99  | 552                                   | $1.81 \times 10^{-6}$                                       | 0.57  | 58,201                                |                                                             |       |                                       |
| 5                   | $4.07 \times 10^{-9}$                                       | 0.92  | 996                                   | $1.33 \times 10^{-6}$                                       | 0.61  | 80,697                                |                                                             |       |                                       |
| 7                   | $3.48 \times 10^{-9}$                                       | 0.92  | 1204                                  | $1.24 \times 10^{-6}$                                       | 0.61  | 90,980                                |                                                             |       |                                       |
| 9                   | $2.71 \times 10^{-9}$                                       | 0.93  | 1416                                  | $1.13 \times 10^{-6}$                                       | 0.62  | 111,980                               |                                                             |       |                                       |
| 11                  | $2.44 \times 10^{-9}$                                       | 0.93  | 1706                                  | $1.11 \times 10^{-6}$                                       | 0.62  | 141,110                               |                                                             |       |                                       |
| 13                  | $2.03 \times 10^{-9}$                                       | 0.94  | 2025                                  | $1.05 \times 10^{-6}$                                       | 0.62  | 145,430                               |                                                             |       |                                       |
| 15                  | $2.11 \times 10^{-9}$                                       | 0.94  | 1978                                  | $1.05 \times 10^{-6}$                                       | 0.62  | 136,070                               |                                                             |       |                                       |
| 17                  | $1.82 \times 10^{-9}$                                       | 0.94  | 2589                                  | $9.63 \times 10^{-7}$                                       | 0.62  | 280,970                               |                                                             |       |                                       |
| 19                  | $1.71 \times 10^{-9}$                                       | 0.94  | 2777                                  | $1.01 \times 10^{-6}$                                       | 0.60  | 190,780                               |                                                             |       |                                       |
| 21                  | $1.63 \times 10^{-9}$                                       | 0.95  | 2985                                  | $1.04 \times 10^{-6}$                                       | 0.60  | 170,060                               |                                                             |       |                                       |
| 23                  | $1.63 \times 10^{-9}$                                       | 0.95  | 3211                                  | $1.05 \times 10^{-6}$                                       | 0.60  | 165,810                               |                                                             |       |                                       |
| HC-SO 0.1–1         |                                                             |       |                                       |                                                             |       |                                       |                                                             |       |                                       |
| Exposure<br>time, h | $CPE_1$                                                     |       | $R_1$ ,<br>$\Omega \cdot \text{cm}^2$ | $CPE_2$                                                     |       | $R_2$ ,<br>$\Omega \cdot \text{cm}^2$ | $CPE_3$                                                     |       | $R_3$ ,<br>$\Omega \cdot \text{cm}^2$ |
|                     | $Q_1$ ,<br>$\text{S} \cdot \text{cm}^{-2} \cdot \text{s}^n$ | $n_1$ |                                       | $Q_2$ ,<br>$\text{S} \cdot \text{cm}^{-2} \cdot \text{s}^n$ | $n_2$ |                                       | $Q_3$ ,<br>$\text{S} \cdot \text{cm}^{-2} \cdot \text{s}^n$ | $n_3$ |                                       |
| 1                   | $8.98 \times 10^{-9}$                                       | 0.88  | 312                                   | $4.49 \times 10^{-7}$                                       | 0.68  | 124,700                               | $3.79 \times 10^{-7}$                                       | 0.70  | 2929                                  |
| 3                   | $3.82 \times 10^{-9}$                                       | 0.91  | 480                                   | $4.37 \times 10^{-7}$                                       | 0.66  | 438,340                               | $5.55 \times 10^{-7}$                                       | 0.65  | 7803                                  |
| 5                   | $9.41 \times 10^{-9}$                                       | 0.88  | 1063                                  | $2.36 \times 10^{-7}$                                       | 0.82  | 338,560                               | $7.00 \times 10^{-7}$                                       | 0.62  | 28,090                                |
| 7                   | $3.84 \times 10^{-8}$                                       | 0.76  | 1736                                  | $2.96 \times 10^{-7}$                                       | 0.83  | 362,960                               | $5.27 \times 10^{-7}$                                       | 0.64  | 25,806                                |
| 9                   | $5.09 \times 10^{-8}$                                       | 0.73  | 2577                                  | $3.32 \times 10^{-7}$                                       | 0.84  | 371,390                               | $4.80 \times 10^{-7}$                                       | 0.65  | 25,046                                |
| 11                  | $6.29 \times 10^{-8}$                                       | 0.72  | 3187                                  | $3.34 \times 10^{-7}$                                       | 0.85  | 406,640                               | $4.79 \times 10^{-7}$                                       | 0.64  | 23,487                                |
| 13                  | $5.86 \times 10^{-8}$                                       | 0.72  | 3503                                  | $3.47 \times 10^{-7}$                                       | 0.85  | 401,680                               | $4.66 \times 10^{-7}$                                       | 0.64  | 21,446                                |
| 15                  | $5.33 \times 10^{-8}$                                       | 0.73  | 3783                                  | $3.65 \times 10^{-7}$                                       | 0.86  | 405,280                               | $4.73 \times 10^{-7}$                                       | 0.63  | 20,419                                |
| 17                  | $5.87 \times 10^{-8}$                                       | 0.72  | 4348                                  | $3.66 \times 10^{-7}$                                       | 0.86  | 406,900                               | $4.83 \times 10^{-7}$                                       | 0.63  | 19,018                                |
| 19                  | $5.80 \times 10^{-8}$                                       | 0.72  | 4742                                  | $3.15 \times 10^{-7}$                                       | 0.87  | 672,940                               | $4.83 \times 10^{-7}$                                       | 0.62  | 20,057                                |
| 21                  | $6.85 \times 10^{-8}$                                       | 0.70  | 6108                                  | $4.08 \times 10^{-7}$                                       | 0.83  | 681,510                               | $3.14 \times 10^{-7}$                                       | 0.69  | 17,759                                |
| 23                  | $6.33 \times 10^{-8}$                                       | 0.71  | 6155                                  | $3.93 \times 10^{-7}$                                       | 0.83  | 692,750                               | $3.63 \times 10^{-7}$                                       | 0.67  | 18,121                                |

**Table S2.** The results of gravimetric measurements of specimens with different types of coatings after 7 days immersion in HBSS

| PEO        |   |   |   |   |
|------------|---|---|---|---|
| Sample (#) | 1 | 2 | 3 | 4 |

|                                                               |          |          |          |          |
|---------------------------------------------------------------|----------|----------|----------|----------|
| Weight before exposure, g                                     | 0.5949   | 0.6908   | 0.5903   | 0.6393   |
| Weight after exposure, g                                      | 0.5929   | 0.6887   | 0.5885   | 0.6370   |
| $\Delta$ , g                                                  | 0.0020   | 0.0021   | 0.0018   | 0.0023   |
| Weight loss, $\text{mg}\cdot\text{cm}^{-2}\cdot\text{d}^{-1}$ | 0.0405   | 0.0426   | 0.0365   | 0.0466   |
| <b>CC-P</b>                                                   |          |          |          |          |
| <b>Sample (#)</b>                                             | <b>1</b> | <b>2</b> | <b>3</b> | <b>4</b> |
| Weight before exposure, g                                     | 0.5491   | 0.6727   | 0.6919   | 0.6998   |
| Weight after exposure, g                                      | 0.5502   | 0.6736   | 0.6929   | 0.7007   |
| Weight increase, g                                            | 0.0011   | 0.0009   | 0.0010   | 0.0009   |
| <b>CC-SO 0.05</b>                                             |          |          |          |          |
| <b>Sample (#)</b>                                             | <b>1</b> | <b>2</b> | <b>3</b> | <b>4</b> |
| Weight before exposure, g                                     | 0.6292   | 0.6286   | 0.6467   | 0.6438   |
| Weight after exposure, g                                      | 0.6234   | 0.6232   | 0.6404   | 0.6389   |
| $\Delta$ , g                                                  | 0.0058   | 0.0054   | 0.0063   | 0.0049   |
| Weight loss, $\text{mg}\cdot\text{cm}^{-2}\cdot\text{d}^{-1}$ | 0.1175   | 0.1094   | 0.1277   | 0.0993   |
| <b>CC-SO 0.1</b>                                              |          |          |          |          |
| <b>Sample (#)</b>                                             | <b>1</b> | <b>2</b> | <b>3</b> | <b>4</b> |
| Weight before exposure, g                                     | 0.6616   | 0.6517   | 0.7033   | 0.6216   |
| Weight after exposure, g                                      | 0.6573   | 0.6491   | 0.6983   | 0.6208   |
| $\Delta$ , g                                                  | 0.0043   | 0.0026   | 0.0050   | 0.0008   |
| Weight loss, $\text{mg}\cdot\text{cm}^{-2}\cdot\text{d}^{-1}$ | 0.0871   | 0.0527   | 0.1013   | 0.0162   |
| <b>HC-SO 0.05–2</b>                                           |          |          |          |          |
| <b>Sample (#)</b>                                             | <b>1</b> | <b>2</b> | <b>3</b> | <b>4</b> |
| Weight before exposure, g                                     | 0.6112   | 0.6168   | 0.6113   | 0.6819   |
| Weight after exposure, g                                      | 0.6089   | 0.6137   | 0.6084   | 0.6787   |
| $\Delta$ , g                                                  | 0.0023   | 0.0031   | 0.0029   | 0.0032   |
| Weight loss, $\text{mg}\cdot\text{cm}^{-2}\cdot\text{d}^{-1}$ | 0.0466   | 0.0628   | 0.0588   | 0.0648   |
| <b>HC-SO 0.1–2</b>                                            |          |          |          |          |
| <b>Sample (#)</b>                                             | <b>1</b> | <b>2</b> | <b>3</b> | <b>4</b> |
| Weight before exposure, g                                     | 0.6734   | 0.6736   | 0.6007   | 0.6671   |
| Weight after exposure, g                                      | 0.6728   | 0.6731   | 0.5999   | 0.6664   |
| $\Delta$ , g                                                  | 0.0006   | 0.0005   | 0.0008   | 0.0007   |
| Weight loss, $\text{mg}\cdot\text{cm}^{-2}\cdot\text{d}^{-1}$ | 0.0122   | 0.0101   | 0.0162   | 0.0141   |
| <b>HC-SO 0.05–1</b>                                           |          |          |          |          |
| <b>Sample (#)</b>                                             | <b>1</b> | <b>2</b> | <b>3</b> | <b>4</b> |
| Weight before exposure, g                                     | 0.6820   | 0.6924   | 0.6991   | 0.7145   |
| Weight after exposure, g                                      | 0.6805   | 0.6910   | 0.6972   | 0.7117   |
| $\Delta$ , g                                                  | 0.0015   | 0.0014   | 0.0019   | 0.0028   |

|                                                               |          |          |          |          |
|---------------------------------------------------------------|----------|----------|----------|----------|
| Weight loss, $\text{mg}\cdot\text{cm}^{-2}\cdot\text{d}^{-1}$ | 0.0304   | 0.0284   | 0.0385   | 0.0567   |
| <b>HC-SO 0.1-1</b>                                            |          |          |          |          |
| <b>Sample (#)</b>                                             | <b>1</b> | <b>2</b> | <b>3</b> | <b>4</b> |
| Weight before exposure, g                                     | 0.6783   | 0.6848   | 0.7317   | 0.7405   |
| Weight after exposure, g                                      | 0.6743   | 0.6819   | 0.7268   | 0.7378   |
| $\Delta$ , g                                                  | 0.0040   | 0.0029   | 0.0049   | 0.0027   |
| Weight loss, $\text{mg}\cdot\text{cm}^{-2}\cdot\text{d}^{-1}$ | 0.0810   | 0.0588   | 0.0993   | 0.0547   |

**Table S3.** The calculated parameters of the EEC elements, obtained by fitting the experimental impedance spectra of the coated AT-Mg samples during their exposure to 0.9 % NaCl solution for 24 h

| Exposure<br>time, h | CPE <sub>1</sub>                                       |                | R <sub>1</sub> , Ω·cm <sup>2</sup> | CPE <sub>2</sub>                                       |                | R <sub>2</sub> , Ω·cm <sup>2</sup> |
|---------------------|--------------------------------------------------------|----------------|------------------------------------|--------------------------------------------------------|----------------|------------------------------------|
|                     | Q <sub>1</sub> ,<br>S·cm <sup>-2</sup> ·s <sup>n</sup> | n <sub>1</sub> |                                    | Q <sub>2</sub> ,<br>S·cm <sup>-2</sup> ·s <sup>n</sup> | n <sub>2</sub> |                                    |
| AT-Mg+PEO           |                                                        |                |                                    |                                                        |                |                                    |
| 1                   | 2.50 × 10 <sup>-6</sup>                                | 0.49           | 252                                | 9.58 × 10 <sup>-5</sup>                                | 0.47           | 795                                |
| 3                   | 1.20 × 10 <sup>-6</sup>                                | 0.52           | 179                                | 9.47 × 10 <sup>-5</sup>                                | 0.69           | 290                                |
| 5                   | 1.08 × 10 <sup>-6</sup>                                | 0.50           | 129                                | 9.47 × 10 <sup>-4</sup>                                | 0.82           | 141                                |
| AT-Mg+CC SO         |                                                        |                |                                    |                                                        |                |                                    |
| 1                   | 1.89 × 10 <sup>-8</sup>                                | 0.87           | 124                                | 2.13 × 10 <sup>-5</sup>                                | 0.51           | 2226                               |
| 3                   | 6.10 × 10 <sup>-9</sup>                                | 0.95           | 158                                | 1.65 × 10 <sup>-4</sup>                                | 0.53           | 412                                |
| 5                   | 3.67 × 10 <sup>-9</sup>                                | 0.99           | 102                                | 1.28 × 10 <sup>-4</sup>                                | 0.79           | 129                                |
| AT-Mg+HC SO         |                                                        |                |                                    |                                                        |                |                                    |
| 1                   | 5.48 × 10 <sup>-10</sup>                               | 0.93           | 8549                               | 7.14 × 10 <sup>-6</sup>                                | 0.21           | 63,813                             |
| 3                   | 5.14 × 10 <sup>-10</sup>                               | 0.94           | 11,940                             | 8.80 × 10 <sup>-6</sup>                                | 0.33           | 30,995                             |
| 5                   | 4.34 × 10 <sup>-10</sup>                               | 0.95           | 12,752                             | 9.20 × 10 <sup>-6</sup>                                | 0.29           | 40,040                             |
| 7                   | 4.71 × 10 <sup>-10</sup>                               | 0.95           | 13,648                             | 8.94 × 10 <sup>-6</sup>                                | 0.34           | 34,488                             |
| 9                   | 4.16 × 10 <sup>-10</sup>                               | 0.96           | 14,976                             | 9.98 × 10 <sup>-6</sup>                                | 0.34           | 32,817                             |
| 11                  | 4.30 × 10 <sup>-10</sup>                               | 0.95           | 13,139                             | 1.62 × 10 <sup>-5</sup>                                | 0.29           | 24,732                             |
| 13                  | 4.25 × 10 <sup>-10</sup>                               | 0.95           | 12,270                             | 2.12 × 10 <sup>-5</sup>                                | 0.29           | 23,097                             |
| 15                  | 4.04 × 10 <sup>-10</sup>                               | 0.96           | 10,476                             | 2.32 × 10 <sup>-5</sup>                                | 0.28           | 19,948                             |
| 17                  | 5.10 × 10 <sup>-10</sup>                               | 0.94           | 6339                               | 5.22 × 10 <sup>-5</sup>                                | 0.26           | 17,148                             |
| 19                  | 9.77 × 10 <sup>-10</sup>                               | 0.89           | 4577                               | 6.25 × 10 <sup>-5</sup>                                | 0.31           | 9667                               |
| 21                  | 4.30 × 10 <sup>-10</sup>                               | 0.97           | 3048                               | 8.03 × 10 <sup>-5</sup>                                | 0.31           | 3414                               |
| 23                  | 1.04 × 10 <sup>-9</sup>                                | 0.91           | 1763                               | 4.47 × 10 <sup>-5</sup>                                | 0.57           | 1345                               |
